# Supplementary material
Source: PubMed Central journal article supplement (PMC3319023)
Supplement: NIHMS362644-supplement-SI.pdf [file NIHMS362644-supplement-SI.pdf]

# Microfabricated polyester conical microwells for cell culture applications – Supplementary Information

Šeila Selimović<sup>† a,b</sup>, Francesco Piraino<sup>† a,b, c</sup>, Hojae Bae<sup>a,b</sup>, Marco Rasponi<sup>c</sup>, Alberto Redaelli<sup>c</sup>, and Ali Khademhosseini<sup>\* a,b,d</sup>

<sup>s</sup> Received (in XXX, XXX) Xth XXXXXXXXXX 200X, Accepted Xth XXXXXXXXXX 200X

First published on the web Xth XXXXXXXXXX 200X

DOI: 10.1039/b000000x

<sup>†</sup>These authors contributed equally to this article.

10

Table 1. Engraving parameters for single and double layer polyester devices and different expected well diameters. The printing parameters are shown in percentage points of the highest values achievable: maximum power is 30W, maximum speed 114 cm/s. The outcoming values represent the actual well diameters in  $\mu\text{m}$ . “x” labels conditions that did not yield a clearly marked well.

15 a) single layer polyester film

20 b) double layer polyester film

| designed diameter | power % |     |     |     |     | designed diameter | power % |     |     |     |     |
|-------------------|---------|-----|-----|-----|-----|-------------------|---------|-----|-----|-----|-----|
|                   | 10%     | 10% | 10% | 10% | 10% |                   | 15%     | 15% | 15% | 15% | 15% |
|                   | 10%     | 15% | 20% | 25% | 30% |                   | 10%     | 15% | 20% | 25% | 30% |
| 50                | 123     | 68  | x   | x   | x   | 50                | 85      | x   | x   | x   | x   |
| 100               | 210     | 160 | 80  | x   | x   | 100               | 187     | 82  | x   | x   | x   |
| 200               | 272     | 214 | 160 | x   | x   | 200               | 265     | 197 | x   | x   | x   |
| 300               | 405     | 340 | 187 | x   | x   | 300               | 333     | 316 | x   | x   | x   |
| 400               | 468     | 398 | 160 | x   | x   | 400               | 469     | 384 | x   | x   | x   |
| 500               | 612     | 558 | 486 | x   | x   | 500               | 568     | 496 | x   | x   | x   |
| designed diameter | 15%     | 15% | 15% | 15% | 15% | designed diameter | 20%     | 20% | 20% | 20% | 20% |
|                   | 10%     | 15% | 20% | 25% | 30% |                   | 10%     | 15% | 20% | 25% | 30% |
| 50                | 187     | 173 | 133 | x   | x   | 50                | 141     | 85  | x   | x   | x   |
| 100               | 255     | 211 | 170 | 157 | 102 | 100               | 214     | 170 | 105 | x   | x   |
| 200               | 323     | 318 | 248 | 228 | 177 | 200               | 282     | 238 | 194 | x   | x   |
| 300               | 432     | 377 | 357 | 323 | 313 | 300               | 425     | 323 | 294 | x   | x   |
| 400               | 510     | 469 | 445 | 432 | 405 | 400               | 595     | 428 | 371 | x   | x   |
| 500               | 558     | 564 | 561 | 527 | 503 | 500               | 602     | 520 | 238 | x   | x   |
| designed diameter | 20%     | 20% | 20% | 20% | 20% | designed diameter | 25%     | 25% | 25% | 25% | 25% |
|                   | 10%     | 15% | 20% | 25% | 30% |                   | 10%     | 15% | 20% | 25% | 30% |
| 50                | 224     | 187 | 155 | 129 | 102 | 50                | 177     | 92  | x   | x   | x   |
| 100               | 282     | 252 | 224 | 187 | 173 | 100               | 255     | 204 | 126 | 58  | x   |
| 200               | 357     | 320 | 289 | 333 | 299 | 200               | 311     | 245 | 262 | 214 | x   |
| 300               | 469     | 425 | 364 | 381 | 357 | 300               | 443     | 398 | 347 | 309 | x   |
| 400               | 537     | 510 | 490 | 459 | 461 | 400               | 527     | 486 | 408 | 241 | x   |
| 500               | 626     | 605 | 602 | 578 | 568 | 500               | 646     | 578 | 527 | 269 | x   |
| designed diameter | 25%     | 25% | 25% | 25% | 25% | designed diameter | 30%     | 30% | 30% | 30% | 30% |
|                   | 10%     | 15% | 20% | 25% | 30% |                   | 20%     | 30% | 40% | 50% |     |
| 50                | 296     | 245 | 187 | 189 | 153 | 50                | 67      | x   | x   | x   |     |
| 100               | 337     | 279 | 269 | 216 | 189 | 100               | 178     | x   | x   | x   |     |
| 200               | 343     | 350 | 323 | 305 | 275 | 200               | 234     | 189 | x   | x   |     |
| 300               | 510     | 459 | 449 | 416 | 389 | 300               | 360     | 227 | x   | x   |     |
| 400               | 568     | 496 | 680 | 540 | 470 | 400               | 467     | 218 | x   | x   |     |
| 500               | 680     | 609 | 605 | 643 | 605 | 500               | 585     | 257 | x   | x   |     |

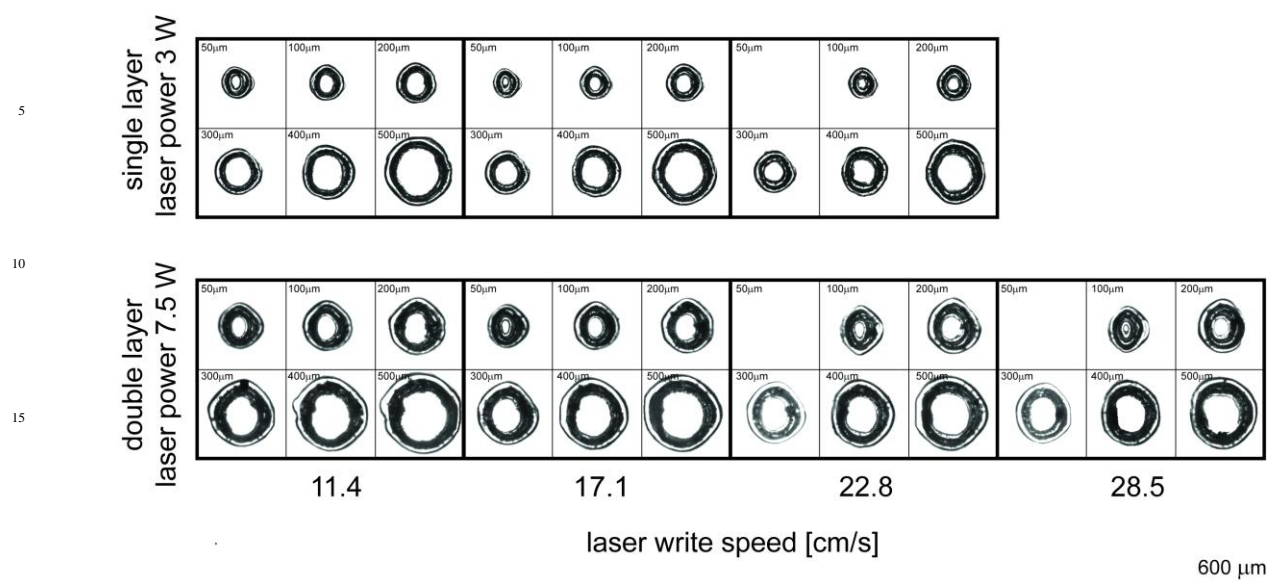

Figure S1. Typical top views of microwells printed at 3W power on a single layer of polyester (top inset) and 7.5 W power on a double-layer stack of polyester film (bottom inset), at increasing laser speeds (from left to right). Six well diameters were considered. The missing pictures represent sets of parameters not able to yield through holes in the polyester device. The scale bar is 600 μm.
